# Supplementary material
Source: Springer Nature journal article supplement (https://www.springermedizin.de/resource/supplementary/12881_2014_1228_MOESM6_ESM.pdf/9452204)

**Figure S3**

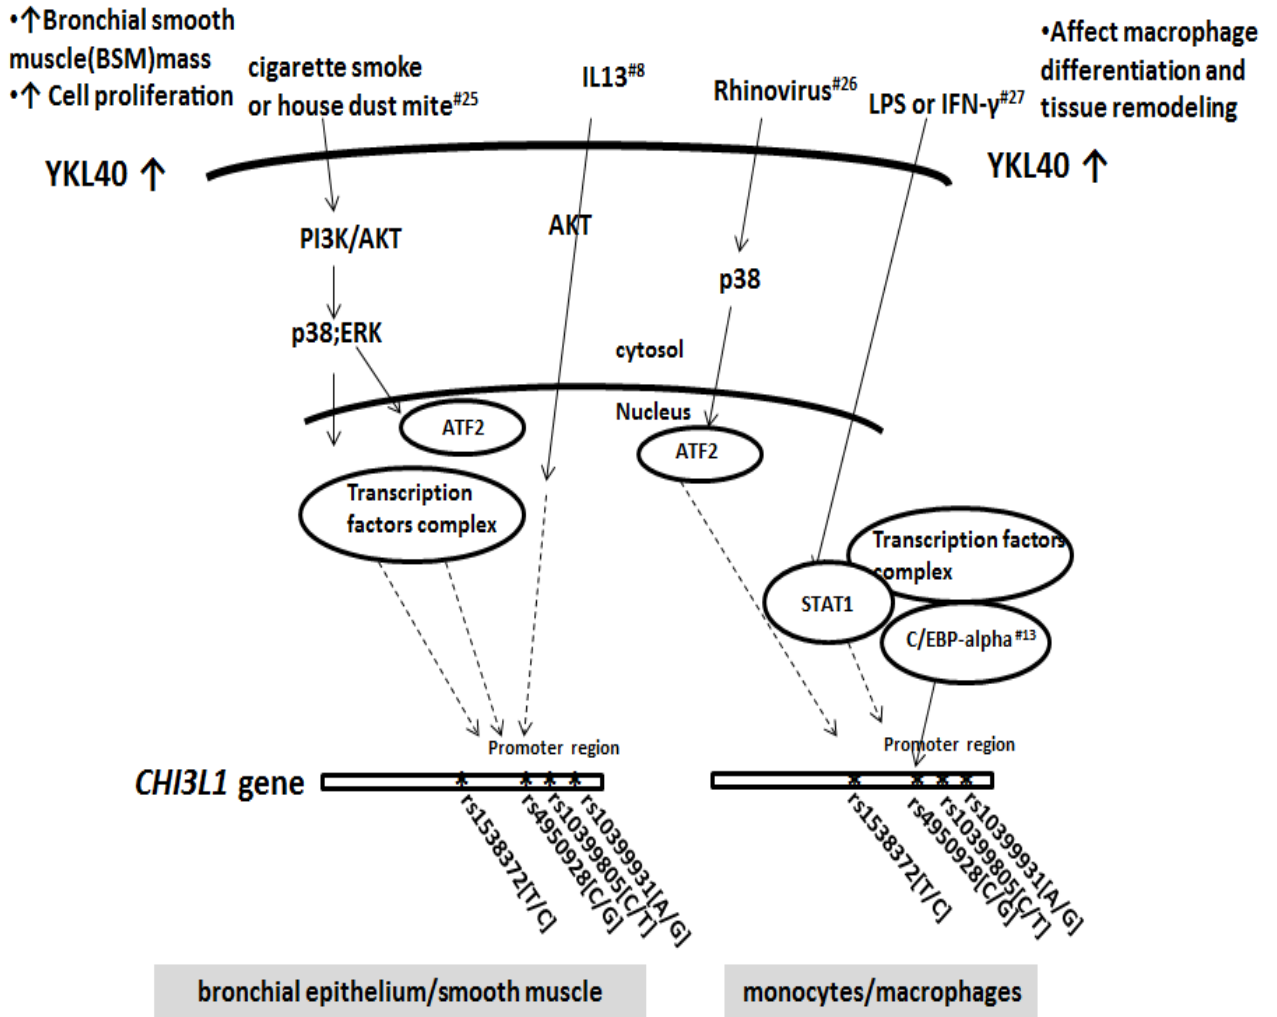

Supplement: MOESM6 [file 9452204]
